# Supplementary material
Source: PubMed Central journal article supplement (PMC9547925)
Supplement: 41467_2022_33686_MOESM1_ESM.pdf [file 41467_2022_33686_MOESM1_ESM.pdf]

## SUPPLEMENTAL TEXT AND FIGURES

**Title:** Trends in non-COVID-19 hospitalizations prior to and during the COVID-19 pandemic period, United States, 2017 – 2021

**Author List:** Kelsie Cassell\*<sup>1</sup>, Casey M. Zipfel<sup>2</sup>, Shweta Bansal<sup>2</sup>, Daniel M. Weinberger<sup>1</sup>

**Affiliations:**

<sup>1</sup>Department of Epidemiology of Microbial Diseases, Yale School of Public Health, New Haven CT, USA

<sup>2</sup>Department of Biology, Georgetown University, Washington DC, USA

**Supplemental Figure S1.**

Number of unique payers in the dataset per month, Jan 1, 2017 – Jun 31, 2021

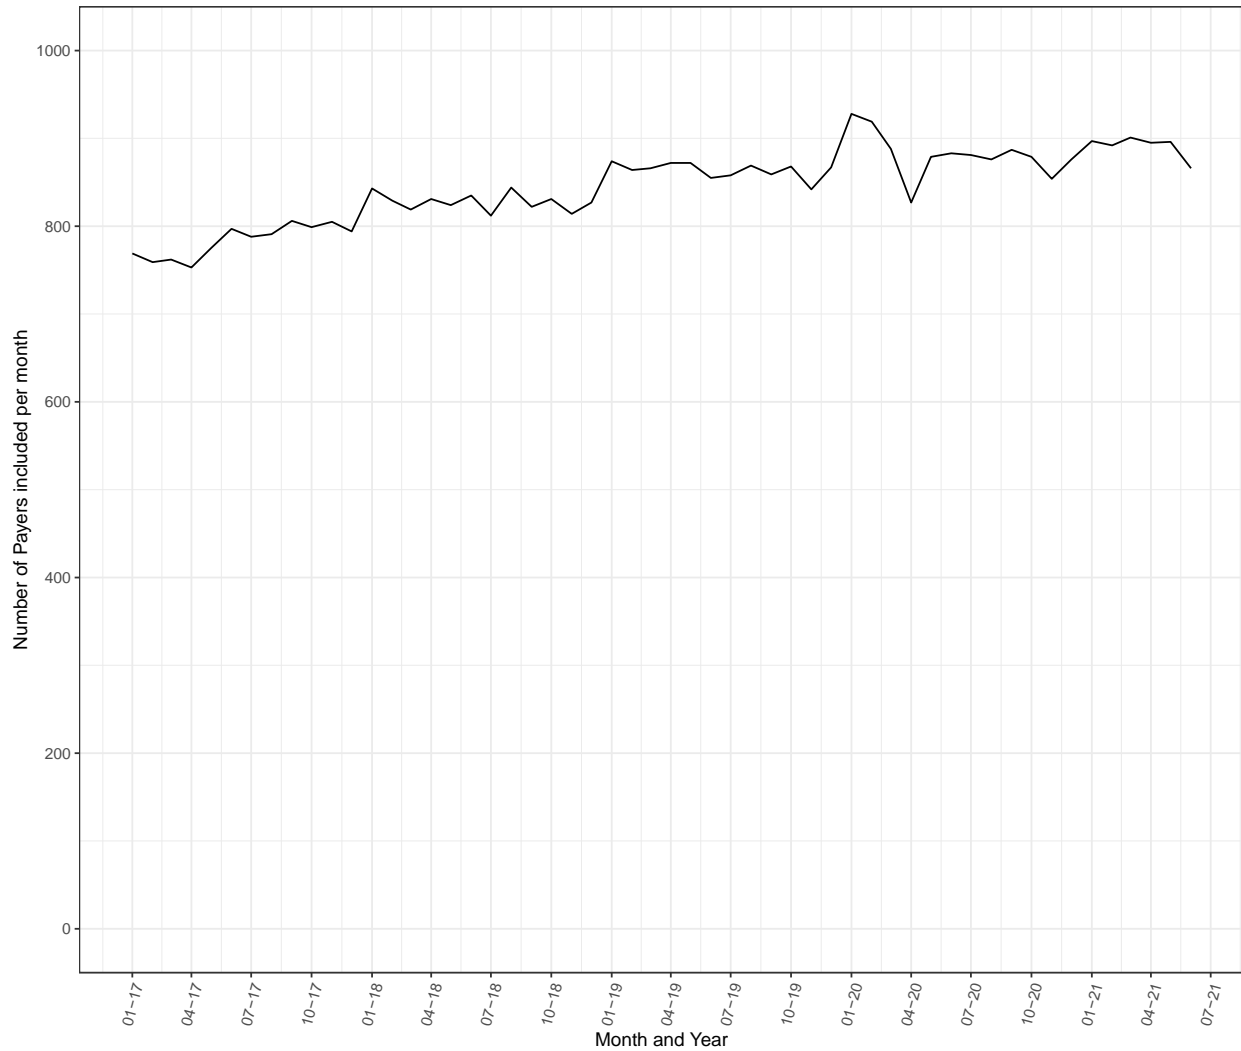

**Note:** Payers indicate insurance providers, not individual patients hospitalized.

**Supplemental Figure S2.** Flowchart illustrating the data subsetting process for the COVID-19 Research Database (C19RDB) inpatient data from OfficeAlly, Jan 1, 2017 – Jun 31, 2021

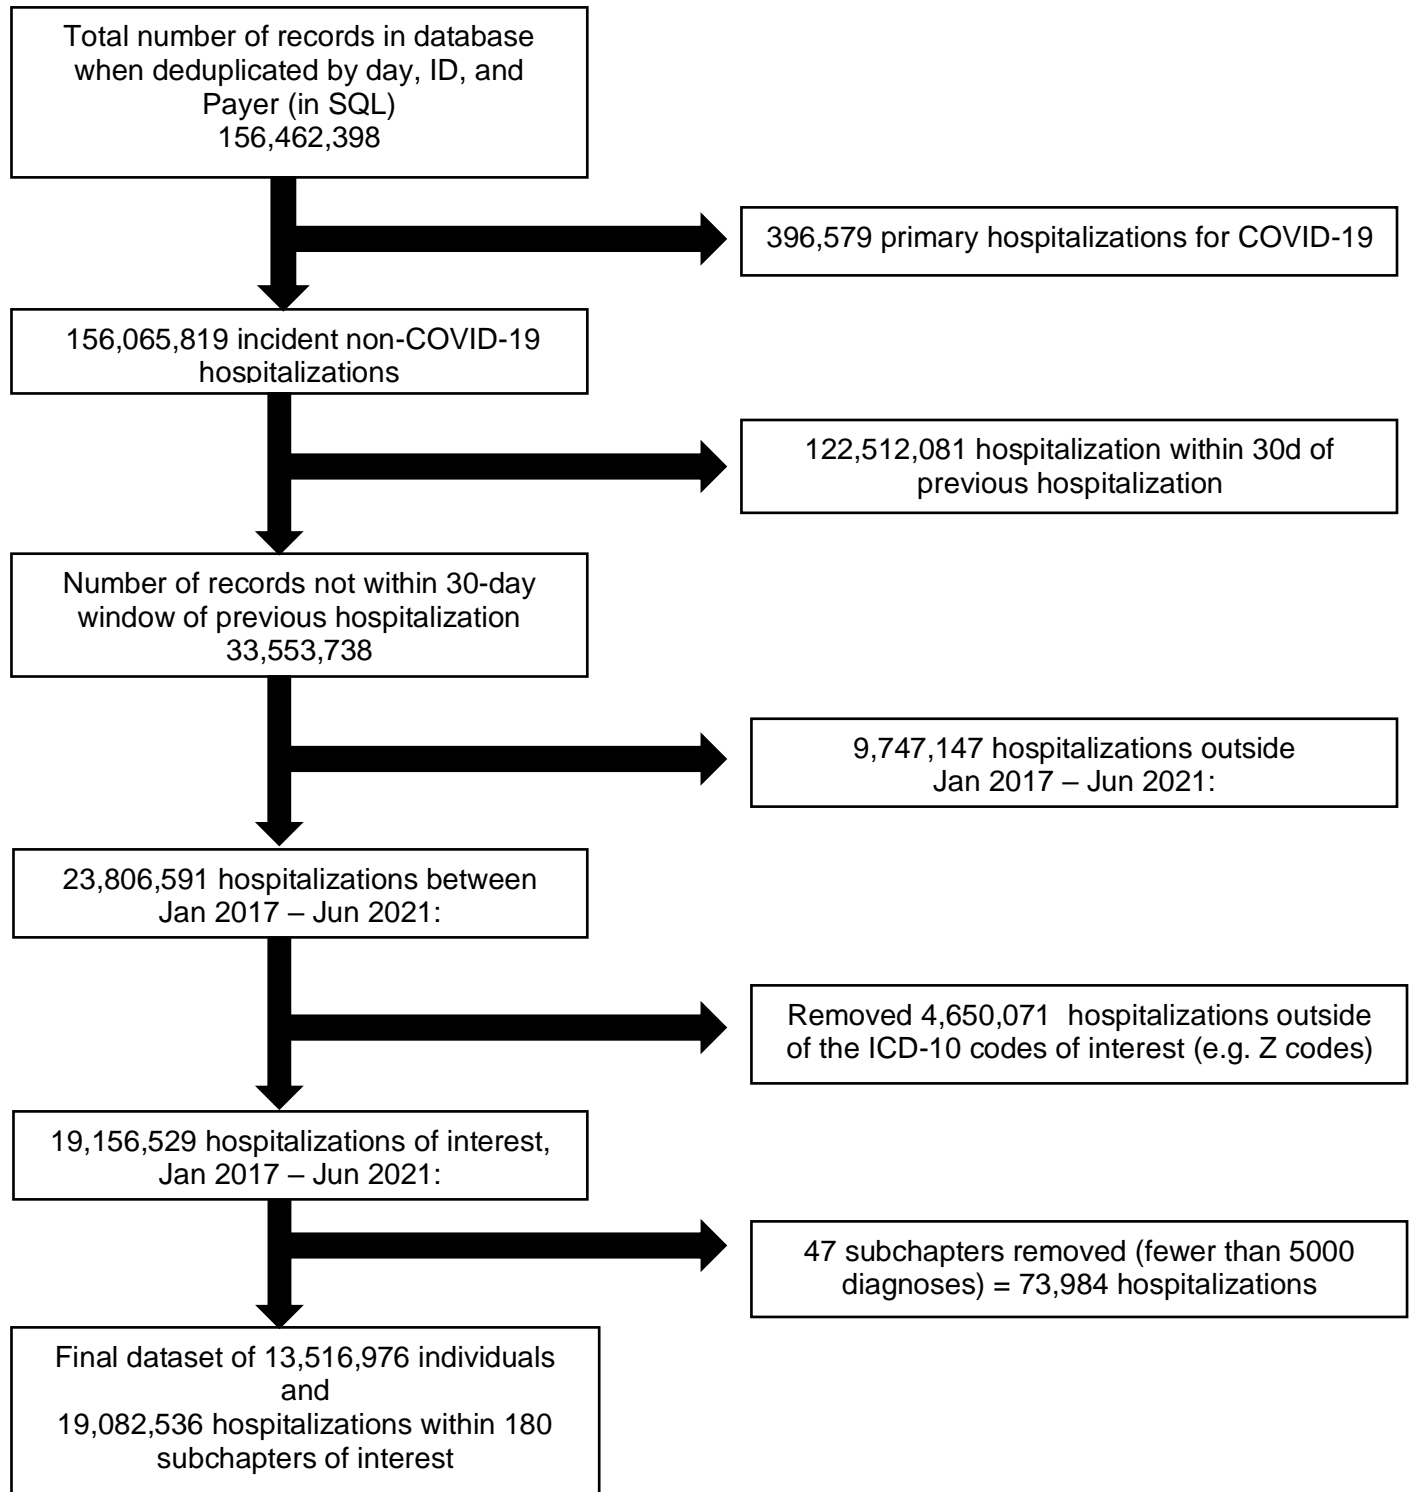

**Supplementary Table S1.** Categorization of ICD-10 Chapters and diagnostic codes

| Chapter No. | ICD-10 Code Range | Description                                                                                         |
|-------------|-------------------|-----------------------------------------------------------------------------------------------------|
| 1           | A00 – B99         | Certain infectious and parasitic diseases                                                           |
| 2           | C00 – D49         | Neoplasms                                                                                           |
| 3           | D50 – D89         | Diseases of the blood and blood-forming organs and certain disorders involving the immune mechanism |
| 4           | E00 – E89         | Endocrine, nutritional and metabolic diseases                                                       |
| 5           | F01 – F99         | Mental, behavioral and neurodevelopmental disorders                                                 |
| 6           | G00 – G99         | Diseases of the nervous system                                                                      |
| 7           | H00 – H59         | Diseases of the eye and adnexa                                                                      |
| 8           | H60 – H95         | Diseases of the ear and mastoid process                                                             |
| 9           | I00 – I99         | Diseases of the circulatory system                                                                  |
| 10          | J00 – J99         | Diseases of the respiratory system                                                                  |
| 11          | K00 – K95         | Diseases of the digestive system                                                                    |
| 12          | L00 – L99         | Diseases of the skin and subcutaneous tissue                                                        |
| 13          | M00 – M99         | Diseases of the musculoskeletal system and connective tissue                                        |
| 14          | N00 – N99         | Diseases of genitourinary system                                                                    |
| 15          | O00 – O9A         | Pregnancy, childbirth and the puerperium                                                            |
| 16          | P00 – P96         | Certain conditions originating in the perinatal period                                              |
| 17          | Q00 – Q99         | Congenital malformations, deformations and chromosomal abnormalities                                |
| 18          | R00 – R99         | Symptoms, signs, and abnormal clinical laboratory findings, not elsewhere classified                |
| 19          | S00 – T88         | Injury, poisoning and certain other consequences of external causes                                 |

**Supplementary Table S2.**

Excluded subchapters (fewer than 5000 diagnoses between Jan1 2017- June 2021)

---

|                                                            |                                                                                  |
|------------------------------------------------------------|----------------------------------------------------------------------------------|
| Acute rheumatic fever (I00-I02)                            | Infectious arthropathies (M00-M02)                                               |
| Arthropod-borne diseases (A90-A99)                         | Infectious and parasitic sequelae (B90-B94)                                      |
| Autoinflammatory syndromes (M04)                           | Inflammatory CNS (G00-G09)                                                       |
| Birth trauma (P10-P15)                                     | Injuries multiple (T07)                                                          |
| Bullous disorders (L10-L14)                                | Necrotic lower respiratory (J85-J86)                                             |
| Burns internal (T26-T28)                                   | Neoplasms of bone (C40-C41)                                                      |
| Burns multiple (T30-T32)                                   | Newborn complications (P00-P04)                                                  |
| Certain zoonotic bacterial (A20-A28)                       | Disorders of optic nerve (H46-H47)                                               |
| Cleft lip (Q35-Q37)                                        | Other diseases caused by chlamydiae (A70-A74)                                    |
| Complications of endocrine system (E36)                    | Other heart disease (I30-I5A)                                                    |
| Complications genitourinary (N99)                          | Other human herpesviruses (B10)                                                  |
| Complications puerperium (O85-O92)                         | Other infectious diseases (B99)                                                  |
| Complications trauma (T79)                                 | Other musculoskeletal (M95)                                                      |
| Complications skin (L76)                                   | Other problems with newborn (P84)                                                |
| Complications spleen (D78)                                 | Other spirochetal diseases (A65-A69)                                             |
| Complications respiratory (J95)                            | Periprosthetic fracture (M97)                                                    |
| Congenital malformations respiratory (Q30-Q34)             | Diseases of peritoneum (K65-K68)                                                 |
| Digestive disorders of the newborn (P76-P78)               | Protozoal disease (B50-B64)                                                      |
| Disorders of glucose and pancreas (E15-E16)                | Respiratory-cardio perinatal (P19-P29)                                           |
| Ear complications (H95)                                    | Rickettsioses (A75-A79)                                                          |
| Endocrine and metabolic disorders of the newborn (P70-P74) | Conditions related to integument and temperature regulation of newborn (P80-P83) |
| Eye complications (H59)                                    | Tuberculosis (A15-A19)                                                           |
| Frostbite (T33-T34)                                        | Unknown mortality (R99)                                                          |
| Glomerular diseases (N00-N08)                              | Unspecified mental (F99)                                                         |
| Helminthiasis (B65-B83)                                    | Viral prion, infections of CNS (A80-A89)                                         |
|                                                            | Ill-defined and unknown mortality (R99)                                          |

**Supplemental Figure S3.**

Number of non-COVID-19 hospitalizations (in ICD-10 chapters A-T) and COVID-19 hospitalizations (all diagnostic field codes) analyzed, Jan 1, 2017 – Jun 31, 2021

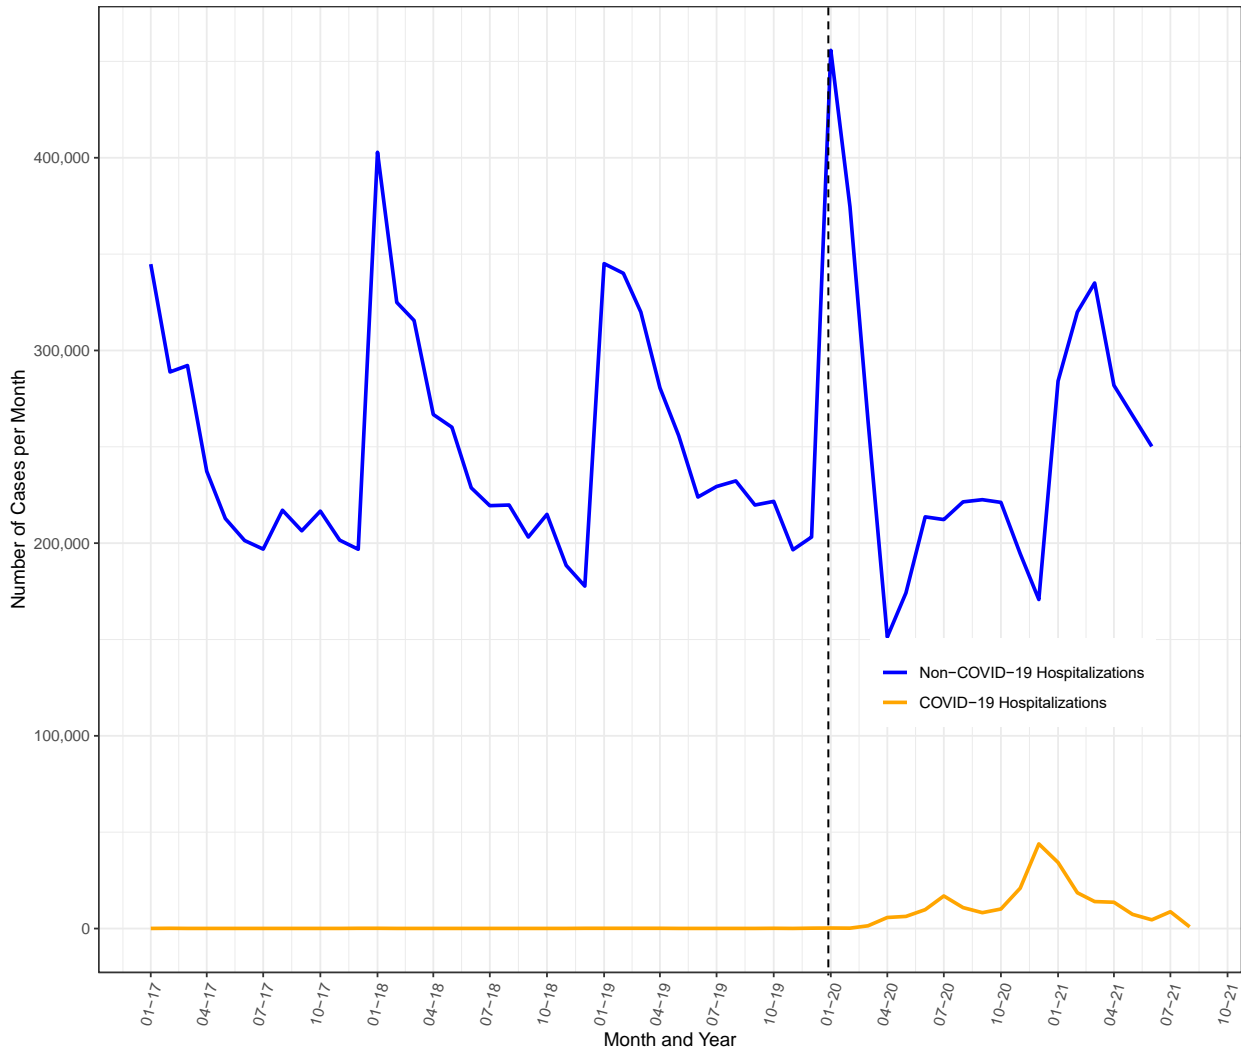

Trends in non-COVID-19 hospitalizations; **SUPPLEMENTAL TEXT AND FIGURES****Supplementary Table S3.** Estimated IRR and 95% Prediction Interval of select ICD10 chapters between Jan and Apr 2020

|                                                                                      | Jan 2020<br>IRR (95%<br>Prediction Interval) | Feb 2020<br>IRR (95%<br>Prediction Interval) | Mar 2020<br>IRR (95%<br>Prediction Interval) | Apr 2020<br>IRR (95%<br>Prediction Interval) |
|--------------------------------------------------------------------------------------|----------------------------------------------|----------------------------------------------|----------------------------------------------|----------------------------------------------|
| Blood and Blood forming organs<br>(D50-D89)                                          | 1.21 (1.17, 1.26)                            | 1.03 (1.00, 1.07)                            | 0.81 (0.78, 0.84)                            | 0.70 (0.67, 0.72)                            |
| Circulatory System<br>(I00-I99)                                                      | 1.13 (1.11, 1.15)                            | 1.02 (1.01, 1.04)                            | 0.74 (0.72, 0.75)                            | 0.77 (0.76, 0.78)                            |
| Congenital malformations, deformations and<br>chromosomal abnormalities<br>(Q00-Q99) | 1.11 (1.06, 1.17)                            | 0.96 (0.91, 1.01)                            | 0.64 (0.61, 0.67)                            | 0.45 (0.43, 0.47)                            |
| Digestive System<br>(K00-K95)                                                        | 1.08 (1.07, 1.10)                            | 0.99 (0.98, 1.01)                            | 0.76 (0.75, 0.77)                            | 0.48 (0.47, 0.49)                            |
| Ear and Mastoid<br>(H60-H95)                                                         | 1.08 (1.05, 1.10)                            | 1.02 (1.00, 1.05)                            | 0.67 (0.67, 0.67)                            | 0.28 (0.27, 0.29)                            |
| Endocrine, Nutritional, and Metabolic<br>(E00-E89)                                   | 1.16 (1.15, 1.18)                            | 1.05 (1.03, 1.06)                            | 0.79 (0.77, 0.80)                            | 0.69 (0.68, 0.70)                            |
| Eye and Adnexa<br>(H00-H59)                                                          | 1.15 (1.12, 1.18)                            | 1.03 (1.01, 1.06)                            | 0.70 (0.69, 0.72)                            | 0.28 (0.28, 0.29)                            |
| Genitourinary System<br>(N00-N99)                                                    | 1.13 (1.12, 1.15)                            | 0.98 (0.97, 0.99)                            | 0.76 (0.75, 0.77)                            | 0.62 (0.62, 0.63)                            |
| Infectious & Parasitic Diseases<br>(A00-B99)                                         | 1.13 (1.11, 1.16)                            | 1.07 (1.05, 1.10)                            | 0.95 (0.93, 0.96)                            | 0.61 (0.60, 0.62)                            |
| Injury, poisoning, external causes<br>(S00-T88)                                      | 1.06 (1.05, 1.07)                            | 1.03 (1.02, 1.04)                            | 0.79 (0.78, 0.79)                            | 0.57 (0.57, 0.58)                            |
| Mental, Behavioral, and Neurodevelopmental<br>(F01-F99)                              | 1.16 (1.14, 1.17)                            | 1.03 (1.01, 1.04)                            | 0.85 (0.84, 0.86)                            | 0.91 (0.89, 0.92)                            |
| Musculoskeletal system and Connective tissue<br>(M00-M99)                            | 1.12 (1.11, 1.13)                            | 1.00 (0.99, 1.01)                            | 0.71 (0.70, 0.72)                            | 0.45 (0.45, 0.45)                            |
| Neoplasms<br>(C00-D49)                                                               | 1.17 (1.14, 1.19)                            | 1.00 (0.98, 1.02)                            | 0.81 (0.79, 0.83)                            | 0.65 (0.64, 0.67)                            |
| Nervous System<br>(G00-G99)                                                          | 1.16 (1.14, 1.18)                            | 1.07 (1.05, 1.09)                            | 0.71 (0.70, 0.72)                            | 0.68 (0.66, 0.69)                            |
| Conditions in the perinatal period<br>(P00-P96)                                      | 0.96 (0.87, 1.06)                            | 0.84 (0.76, 0.94)                            | 0.85 (0.77, 0.94)                            | 0.85 (0.77, 0.95)                            |
| Pregnancy, Childbirth, and Puerperium<br>(O00-O9A)                                   | 1.07 (1.04, 1.09)                            | 0.97 (0.95, 0.99)                            | 0.92 (0.90, 0.94)                            | 0.89 (0.87, 0.91)                            |
| Respiratory System<br>(J00-J99)                                                      | 1.15 (1.14, 1.16)                            | 1.09 (1.08, 1.10)                            | 0.93 (0.92, 0.94)                            | 0.40 (0.40, 0.41)                            |
| Signs and Symptoms not elsewhere classified<br>(R00-R99)                             | 1.12 (1.10, 1.13)                            | 1.02 (1.01, 1.03)                            | 0.83 (0.83, 0.84)                            | 0.58 (0.58, 0.58)                            |
| Skin and Subcutaneous<br>(L00-L99)                                                   | 1.10 (1.07, 1.12)                            | 1.01 (1.00, 1.03)                            | 0.77 (0.75, 0.78)                            | 0.60 (0.59, 0.61)                            |

Trends in non-COVID-19 hospitalizations; **SUPPLEMENTAL TEXT AND FIGURES**

**Supplementary Figure S4.**

Incidence Rate Ratio (IRR) per Diagnostic Chapter for the months between January 2020 and June 2021S

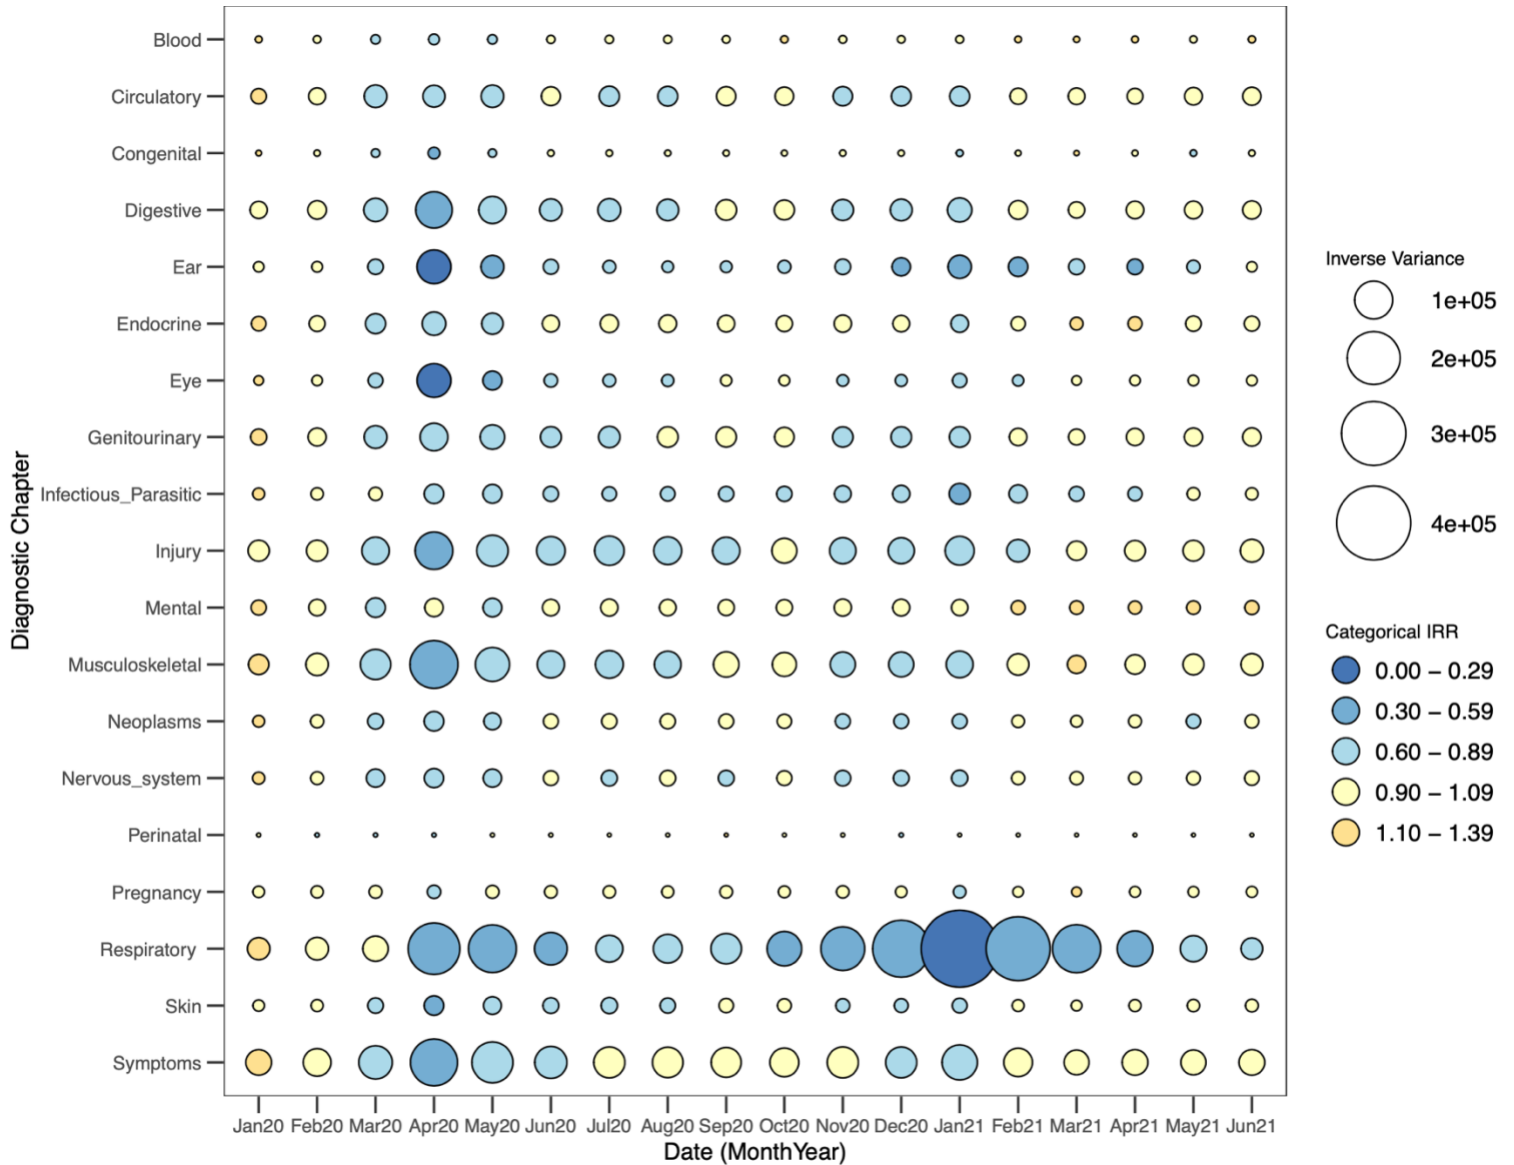

**Figure S4 Note:** Each bubble is colored according to IRR and the diameter of the bubble is proportional to the inverse of the IRR variance estimate (i.e. a larger bubble signifies greater confidence in the estimate).

**Supplemental Figure S5:**  
Results of hierarchical clustering of subchapters revealing three clusters

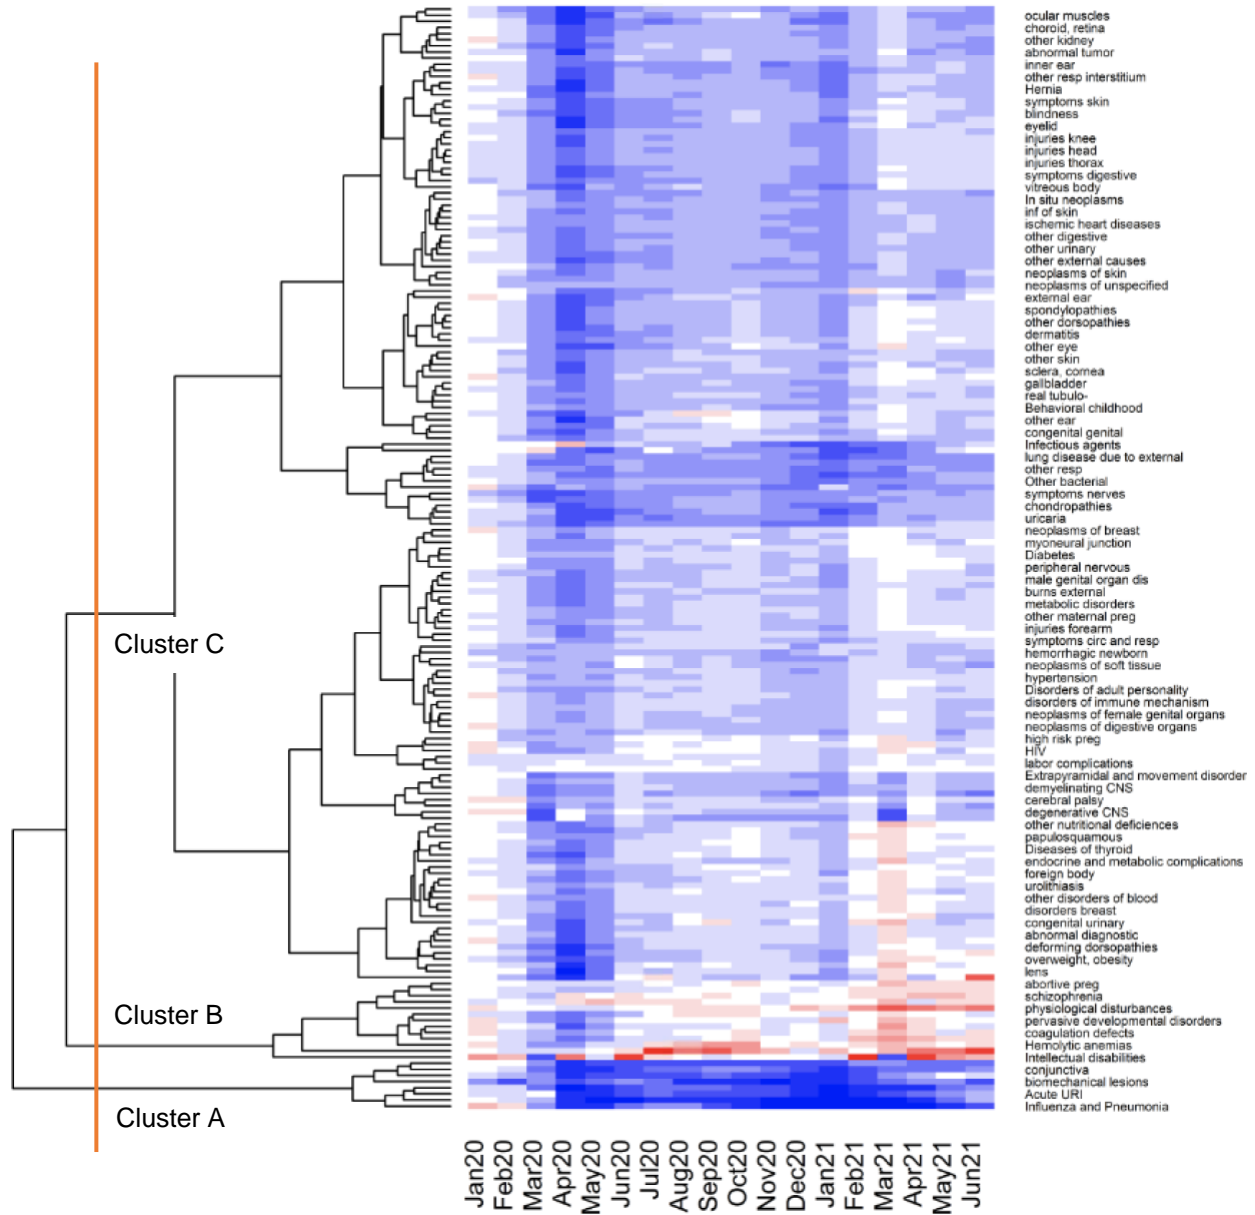



**Supplemental Figure S6.**

Time series of observed hospitalizations per diagnostic subchapter by month and year (solid line) with model predicted case counts (dashed line) and confidence intervals (grey).

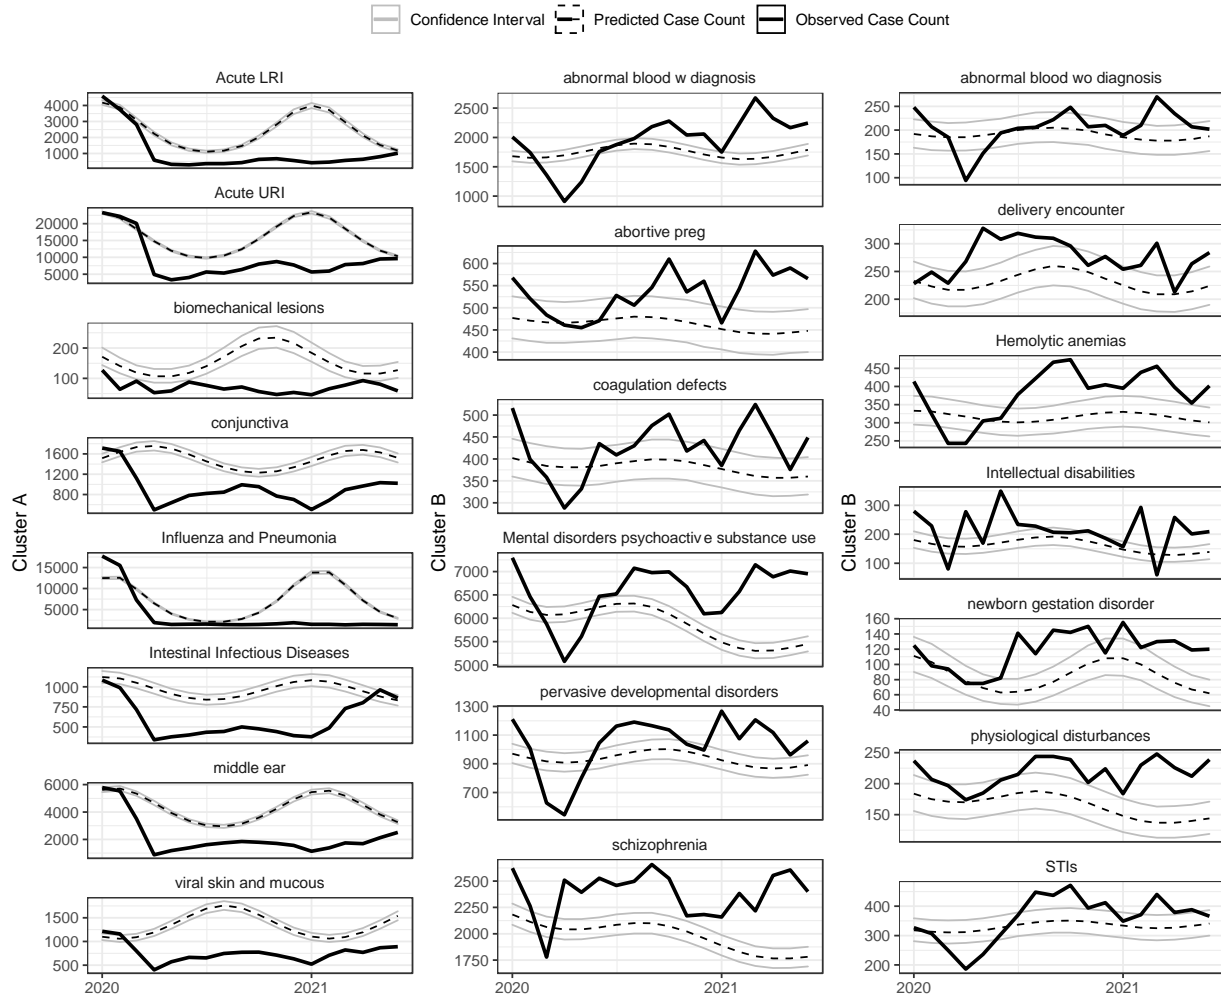

**Description Supplemental Figure S6.** Data are presented as the observed case count per month (black), with regression model predicted case counts (dashed black) surrounded by a gray prediction interval estimated through two-stage simulation using Monte Carlo resampling that accounted for parameter uncertainty and observation uncertainty

Trends in non-COVID-19 hospitalizations; **SUPPLEMENTAL TEXT AND FIGURES**

**Supplementary Table S4.** Incidence Rate Ratio and 95% Prediction interval of select Subchapters of disease, March 2020 to December 2020

| Subchapter                                  | Mar                  | Apr                  | May                  | Jun                  | Jul                  | Aug                  | Sept                 | Oct                  | Nov                  | Dec                  |
|---------------------------------------------|----------------------|----------------------|----------------------|----------------------|----------------------|----------------------|----------------------|----------------------|----------------------|----------------------|
| I&P<br>(J09-J18)                            | 0.74<br>(0.72, 0.76) | 0.29<br>(0.28, 0.30) | 0.37<br>(0.35, 0.38) | 0.58<br>(0.56, 0.61) | 0.74<br>(0.71, 0.78) | 0.68<br>(0.65, 0.71) | 0.51<br>(0.49, 0.53) | 0.35<br>(0.34, 0.36) | 0.23<br>(0.23, 0.24) | 0.17<br>(0.17, 0.18) |
| Acute URI<br>(J00 – J06)                    | 1.09<br>(1.07, 1.08) | 0.33<br>(0.33, 0.34) | 0.28<br>(0.27, 0.28) | 0.39<br>(0.38, 0.40) | 0.58<br>(0.53, 0.59) | 0.51<br>(0.50, 0.52) | 0.51<br>(0.50, 0.52) | 0.52<br>(0.51, 0.53) | 0.46<br>(0.45, 0.46) | 0.35<br>(0.34, 0.35) |
| Acute LRI<br>(J20-J22)                      | 0.91<br>(0.87, 0.95) | 0.26<br>(0.25, 0.27) | 0.20<br>(0.19, 0.21) | 0.24<br>(0.22, 0.25) | 0.33<br>(0.31, 0.35) | 0.31<br>(0.29, 0.33) | 0.29<br>(0.27, 0.31) | 0.31<br>(0.30, 0.33) | 0.24<br>(0.23, 0.25) | 0.16<br>(0.15, 0.16) |
| Viral skin and<br>mucous<br>(B00 – B09)     | 0.74<br>(0.69, 0.79) | 0.34<br>(0.32, 0.36) | 0.42<br>(0.40, 0.45) | 0.43<br>(0.41, 0.46) | 0.39<br>(0.37, 0.41) | 0.43<br>(0.40, 0.45) | 0.45<br>(0.43, 0.48) | 0.50<br>(0.47, 0.53) | 0.52<br>(0.49, 0.55) | 0.52<br>(0.49, 0.56) |
| Middle ear<br>(H65 – H75)                   | 0.66<br>(0.64, 0.68) | 0.19<br>(0.18, 0.19) | 0.30<br>(0.29, 0.31) | 0.41<br>(0.40, 0.43) | 0.53<br>(0.51, 0.55) | 0.59<br>(0.57, 0.61) | 0.59<br>(0.57, 0.61) | 0.50<br>(0.48, 0.52) | 0.40<br>(0.39, 0.42) | 0.32<br>(0.31, 0.33) |
| Intestinal<br>Infectious<br>(A00-A09)       | 0.68<br>(0.64, 0.73) | 0.35<br>(0.32, 0.37) | 0.42<br>(0.39, 0.44) | 0.46<br>(0.43, 0.50) | 0.52<br>(0.48, 0.56) | 0.52<br>(0.49, 0.56) | 0.56<br>(0.53, 0.61) | 0.50<br>(0.47, 0.54) | 0.44<br>(0.41, 0.47) | 0.37<br>(0.34, 0.40) |
| Intellectual<br>Disabilities<br>(F70 – F79) | 0.51<br>(0.43, 0.60) | 1.77<br>(1.50, 2.11) | 1.04<br>(0.89, 1.24) | 2.04<br>(1.75, 2.42) | 1.30<br>(1.11, 1.53) | 1.21<br>(1.04, 1.43) | 1.08<br>(0.93, 1.27) | 1.10<br>(0.94, 1.29) | 1.20<br>(1.03, 1.44) | 1.15<br>(0.98, 1.38) |
| Schizophrenia<br>(F20 – F29)                | 0.86<br>(0.82, 0.90) | 1.23<br>(1.17, 1.29) | 1.17<br>(1.12, 1.23) | 1.23<br>(1.17, 1.28) | 1.18<br>(1.13, 1.24) | 1.19<br>(1.14, 1.25) | 1.27<br>(1.21, 1.33) | 1.22<br>(1.16, 1.28) | 1.07<br>(1.02, 1.13) | 1.11<br>(1.06, 1.17) |
| STI<br>(A50 – A64)                          | 0.80<br>(0.71, 0.92) | 0.60<br>(0.53, 0.68) | 0.74<br>(0.66, 0.84) | 0.93<br>(0.83, 1.06) | 1.10<br>(0.97, 1.24) | 1.30<br>(1.16, 1.47) | 1.25<br>(1.11, 1.41) | 1.34<br>(1.20, 1.52) | 1.13<br>(1.01, 1.29) | 1.21<br>(1.07, 1.38) |
| Hemolytic<br>anemias<br>(D55 – D59)         | 0.75<br>(0.67, 0.85) | 0.77<br>(0.68, 0.87) | 0.99<br>(0.88, 1.12) | 1.03<br>(0.91, 1.17) | 1.26<br>(1.12, 1.43) | 1.39<br>(1.24, 1.58) | 1.52<br>(1.35, 1.73) | 1.50<br>(1.33, 1.72) | 1.22<br>(1.09, 1.40) | 1.23<br>(1.09, 1.41) |
| Coagulation<br>defects<br>(D65 – D69)       | 0.93<br>(0.83, 1.04) | 0.76<br>(0.68, 0.85) | 0.87<br>(0.78, 0.98) | 1.13<br>(1.02, 1.27) | 1.05<br>(0.95, 1.18) | 1.09<br>(0.98, 1.22) | 1.19<br>(1.07, 1.34) | 1.26<br>(1.13, 1.41) | 1.06<br>(0.95, 1.19) | 1.15<br>(1.02, 1.29) |

Trends in non-COVID-19 hospitalizations; **SUPPLEMENTAL TEXT AND FIGURES****Supplementary Table S5.**

Sensitivity Analysis Results: Incidence Rate Ratio (Median) and 95% sample interval of ICD-10 Chapters of disease, March 2021 to December 2021

|                                                                                | Jan 2020<br>IRR (95%<br>Prediction Interval) | Feb 2020<br>IRR (95%<br>Prediction Interval) | Mar 2020<br>IRR (95%<br>Prediction Interval) | Apr 2020<br>IRR (95%<br>Prediction Interval) |
|--------------------------------------------------------------------------------|----------------------------------------------|----------------------------------------------|----------------------------------------------|----------------------------------------------|
| Blood and Blood forming organs (D50-D89)                                       | 1.21 (1.18, 1.26)                            | 1.03 (1.00, 1.07)                            | 0.81 (0.79, 0.84)                            | 0.70 (0.67, 0.73)                            |
| Circulatory System (I00-I99)                                                   | 1.14 (1.10, 1.19)                            | 1.03 (0.99, 1.07)                            | 0.74 (0.72, 0.76)                            | 0.77 (0.71, 0.82)                            |
| Congenital malformations, deformations and chromosomal abnormalities (Q00-Q99) | 1.11 (1.06, 1.18)                            | 0.96 (0.90, 1.02)                            | 0.64 (0.60, 0.68)                            | 0.44 (0.42, 0.49)                            |
| Digestive System (K00-K95)                                                     | 1.08 (1.06, 1.12)                            | 1.00 (0.98, 1.04)                            | 0.77 (0.75, 0.79)                            | 0.48 (0.46, 0.50)                            |
| Ear and Mastoid (H60-H95)                                                      | 1.08 (1.02, 1.14)                            | 1.02 (0.97, 1.08)                            | 0.67 (0.64, 0.71)                            | 0.28 (0.25, 0.31)                            |
| Endocrine, Nutritional, and Metabolic (E00-E89)                                | 1.17 (1.13, 1.21)                            | 1.05 (1.01, 1.08)                            | 0.79 (0.76, 0.81)                            | 0.68 (0.64, 0.72)                            |
| Eye and Adnexa (H00-H59)                                                       | 1.16 (1.11, 1.21)                            | 1.04 (1.00, 1.09)                            | 0.71 (0.68, 0.75)                            | 0.28 (0.26, 0.31)                            |
| Genitourinary System (N00-N99)                                                 | 1.14 (1.09, 1.19)                            | 0.99 (0.96, 1.02)                            | 0.77 (0.74, 0.80)                            | 0.63 (0.60, 0.66)                            |
| Infectious & Parasitic Diseases (A00-B99)                                      | 1.14 (1.10, 1.18)                            | 1.08 (1.04, 1.12)                            | 0.95 (0.92, 0.99)                            | 0.61 (0.57, 0.67)                            |
| Injury, poisoning, external causes (S00-T88)                                   | 1.06 (1.03, 1.11)                            | 1.03 (1.00, 1.08)                            | 0.80 (0.77, 0.82)                            | 0.58 (0.56, 0.61)                            |
| Mental, Behavioral, and Neurodevelopmental (F01-F99)                           | 1.15 (1.12, 1.19)                            | 1.02 (1.00, 1.05)                            | 0.85 (0.80, 0.87)                            | 0.90 (0.84, 0.94)                            |
| Musculoskeletal system and Connective tissue (M00-M99)                         | 1.13 (1.09, 1.17)                            | 1.00 (0.97, 1.04)                            | 0.72 (0.70, 0.74)                            | 0.45 (0.43, 0.47)                            |
| Neoplasms (C00-D49)                                                            | 1.17 (1.14, 1.23)                            | 1.01 (0.98, 1.06)                            | 0.81 (0.79, 0.86)                            | 0.65 (0.63, 0.69)                            |
| Nervous System (G00-G99)                                                       | 1.16 (1.12, 1.21)                            | 1.08 (1.04, 1.12)                            | 0.71 (0.69, 0.73)                            | 0.68 (0.63, 0.73)                            |
| Conditions in the perinatal period (P00-P96)                                   | 1.00 (0.94, 1.05)                            | 0.86 (0.82, 0.90)                            | 0.88 (0.83, 0.95)                            | 0.87 (0.82, 0.93)                            |
| Pregnancy, Childbirth, and Puerperium (O00-O9A)                                | 1.07 (1.03, 1.12)                            | 0.97 (0.94, 1.02)                            | 0.92 (0.89, 0.96)                            | 0.89 (0.86, 0.93)                            |
| Respiratory System (J00-J99)                                                   | 1.15 (1.10, 1.20)                            | 1.09 (1.05, 1.14)                            | 0.93 (0.90, 0.97)                            | 0.41 (0.38, 0.44)                            |
| Signs and Symptoms not elsewhere classified (R00-R99)                          | 1.12 (1.09, 1.17)                            | 1.02 (0.99, 1.07)                            | 0.84 (0.81, 0.87)                            | 0.58 (0.56, 0.62)                            |
| Skin and Subcutaneous (L00-L99)                                                | 1.10 (1.06, 1.14)                            | 1.01 (0.97, 1.05)                            | 0.77 (0.74, 0.80)                            | 0.60 (0.57, 0.63)                            |

Trends in non-COVID-19 hospitalizations; **SUPPLEMENTAL TEXT AND FIGURES**

**Supplementary Table S6.** Sensitivity Analysis Results: Incidence Rate Ratio (Median) and 95% sample interval of select Subchapters of disease, March 2020 to December 2020

| Subchapter                                  | Mar                  | Apr                  | May                  | Jun                  | Jul                  | Aug                  | Sept                 | Oct                  | Nov                  | Dec                  |
|---------------------------------------------|----------------------|----------------------|----------------------|----------------------|----------------------|----------------------|----------------------|----------------------|----------------------|----------------------|
| I&P<br>(J09-J18)                            | 0.74 (0.71,<br>0.79) | 0.30 (0.28,<br>0.33) | 0.37 (0.34,<br>0.40) | 0.59 (0.53,<br>0.66) | 0.75 (0.68,<br>0.83) | 0.68 (0.62,<br>0.76) | 0.51 (0.46,<br>0.58) | 0.35 (0.32,<br>0.40) | 0.24 (0.21,<br>0.28) | 0.18 (0.16,<br>0.21) |
| Acute URI<br>(J00 – J06)                    | 1.10 (1.05,<br>1.16) | 0.34 (0.31,<br>0.37) | 0.28 (0.26,<br>0.31) | 0.39 (0.36,<br>0.44) | 0.58 (0.53,<br>0.64) | 0.51 (0.46,<br>0.57) | 0.51 (0.46,<br>0.58) | 0.52 (0.47,<br>0.59) | 0.46 (0.42,<br>0.52) | 0.35 (0.31,<br>0.40) |
| Acute LRI<br>(J20-J22)                      | 0.91 (0.86,<br>0.97) | 0.26 (0.24,<br>0.30) | 0.20 (0.19,<br>0.22) | 0.24 (0.21,<br>0.27) | 0.33 (0.30,<br>0.37) | 0.31 (0.28,<br>0.35) | 0.29 (0.26,<br>0.33) | 0.31 (0.28,<br>0.36) | 0.24 (0.22,<br>0.28) | 0.16 (0.14,<br>0.18) |
| Viral skin and<br>mucous<br>(B00 – B09)     | 0.74 (0.70,<br>0.79) | 0.34 (0.31,<br>0.38) | 0.42 (0.39,<br>0.47) | 0.44 (0.40,<br>0.49) | 0.39 (0.35,<br>0.44) | 0.43 (0.39,<br>0.48) | 0.45 (0.41,<br>0.51) | 0.50 (0.45,<br>0.56) | 0.52 (0.48,<br>0.58) | 0.52 (0.48,<br>0.59) |
| Middle ear<br>(H65 – H75)                   | 0.65 (0.62,<br>0.71) | 0.19 (0.17,<br>0.21) | 0.30 (0.28,<br>0.33) | 0.41 (0.38,<br>0.46) | 0.54 (0.49,<br>0.59) | 0.59 (0.52,<br>0.67) | 0.59 (0.51,<br>0.67) | 0.50 (0.44,<br>0.58) | 0.40 (0.35,<br>0.48) | 0.32 (0.28,<br>0.37) |
| Intestinal<br>Infectious<br>(A00-A09)       | 0.68 (0.65,<br>0.72) | 0.35 (0.32,<br>0.39) | 0.42 (0.39,<br>0.45) | 0.47 (0.43,<br>0.51) | 0.52 (0.47,<br>0.56) | 0.53 (0.48,<br>0.58) | 0.57 (0.52,<br>0.63) | 0.51 (0.46,<br>0.57) | 0.44 (0.40,<br>0.51) | 0.38 (0.34,<br>0.43) |
| Intellectual<br>Disabilities<br>(F70 – F79) | 0.49 (0.42,<br>0.53) | 1.77 (1.44,<br>1.91) | 1.07 (0.82,<br>1.14) | 2.11 (1.50,<br>2.29) | 1.33 (0.89,<br>1.42) | 1.24 (0.78,<br>1.33) | 1.11 (0.68,<br>1.21) | 1.12 (0.68,<br>1.24) | 1.25 (0.76,<br>1.40) | 1.21 (0.76,<br>1.34) |
| Schizophrenia<br>(F20 – F29)                | 0.88 (0.75,<br>0.93) | 1.23 (1.00,<br>1.33) | 1.18 (0.95,<br>1.28) | 1.24 (1.00,<br>1.32) | 1.19 (0.94,<br>1.27) | 1.20 (0.94,<br>1.28) | 1.27 (0.99,<br>1.36) | 1.23 (0.95,<br>1.33) | 1.08 (0.87,<br>1.17) | 1.13 (0.90,<br>1.23) |
| STI<br>(A50 – A64)                          | 0.81 (0.75,<br>0.90) | 0.59 (0.52,<br>0.66) | 0.75 (0.69,<br>0.86) | 0.94 (0.87,<br>1.06) | 1.10 (1.00,<br>1.23) | 1.30 (1.19,<br>1.46) | 1.25 (1.12,<br>1.41) | 1.35 (1.21,<br>1.56) | 1.14 (1.01,<br>1.34) | 1.21 (1.10,<br>1.44) |
| Hemolytic<br>anemias<br>(D55 – D59)         | 0.74 (0.67,<br>0.79) | 0.77 (0.68,<br>0.84) | 0.98 (0.86,<br>1.06) | 1.03 (0.88,<br>1.16) | 1.26 (1.03,<br>1.37) | 1.40 (1.10,<br>1.60) | 1.52 (1.18,<br>1.79) | 1.52 (1.24,<br>1.74) | 1.23 (1.02,<br>1.46) | 1.24 (1.05,<br>1.39) |
